# Supplementary material for: Repeated evolution of cytochrome P450-mediated spiroketal steroid biosynthesis in plants
Source: PubMed Central journal article supplement (PMC6642093; doi:10.1038/s41467-019-11286-7), 2019-07-19
Supplement: 41467_2019_11286_MOESM2_ESM.pdf [file 41467_2019_11286_MOESM2_ESM.pdf]

## Description of Additional Supplementary Files

File name: Supplementary Data 1

Description: Plasmids generated in this study

File name: Supplementary Data 2

Description: CYPs selected for the screen presented in Figure 1

File name: Supplementary Data 3

Description: Primers used in this study
